# Supplementary material
Source: PubMed Central journal article supplement (PMC7236073)
Supplement: BPH-177-2872-s001.pdf [file BPH-177-2872-s001.pdf]

## **SUPPLEMENTAL MATERIAL**

**This file includes:**

### **Materials and Methods**

**Figure S1.** Immunohistochemical staining.

**Figure S2.** Phenotypic changes in animals.

**Figure S3.** Immunofluorescence staining of Mep1A and different cell markers.

**Figure S4.** Cellular mechanism.

**Figure S5.** Expression of Collagen I in aorta.

**Table S1.** Clinical information of samples.

**Table S2.** RT-PCR Primers.



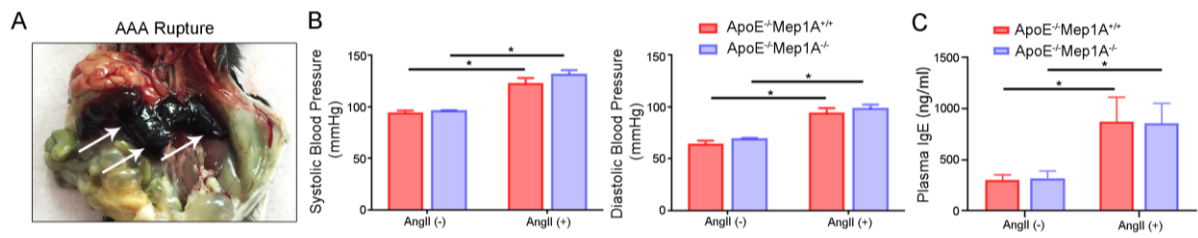

**Figure S2. Phenotypic changes in animals.**

(A) The picture of AAA rupture in mice. (B) Average blood pressures including systolic blood pressure and diastolic blood pressure in indicated mice with or without AngII infusion. (C) ELISA analysis of plasma IgE levels in normal and AAA mice of the indicated groups. Data represent the mean  $\pm$  standard error of mean (SEM). ApoE<sup>-/-</sup>Mep1A<sup>+/+</sup> mice treated with PBS (n=5), ApoE<sup>-/-</sup>Mep1A<sup>-/-</sup> mice treated with PBS (n=6), ApoE<sup>-/-</sup>Mep1A<sup>+/+</sup> mice treated with AngII (n=14) and ApoE<sup>-/-</sup>Mep1A<sup>-/-</sup> mice treated with AngII (n=11). Two-way ANOVA was conducted to examine the statistical significance for all data. \**P* value <0.05 were considered statistically significant.

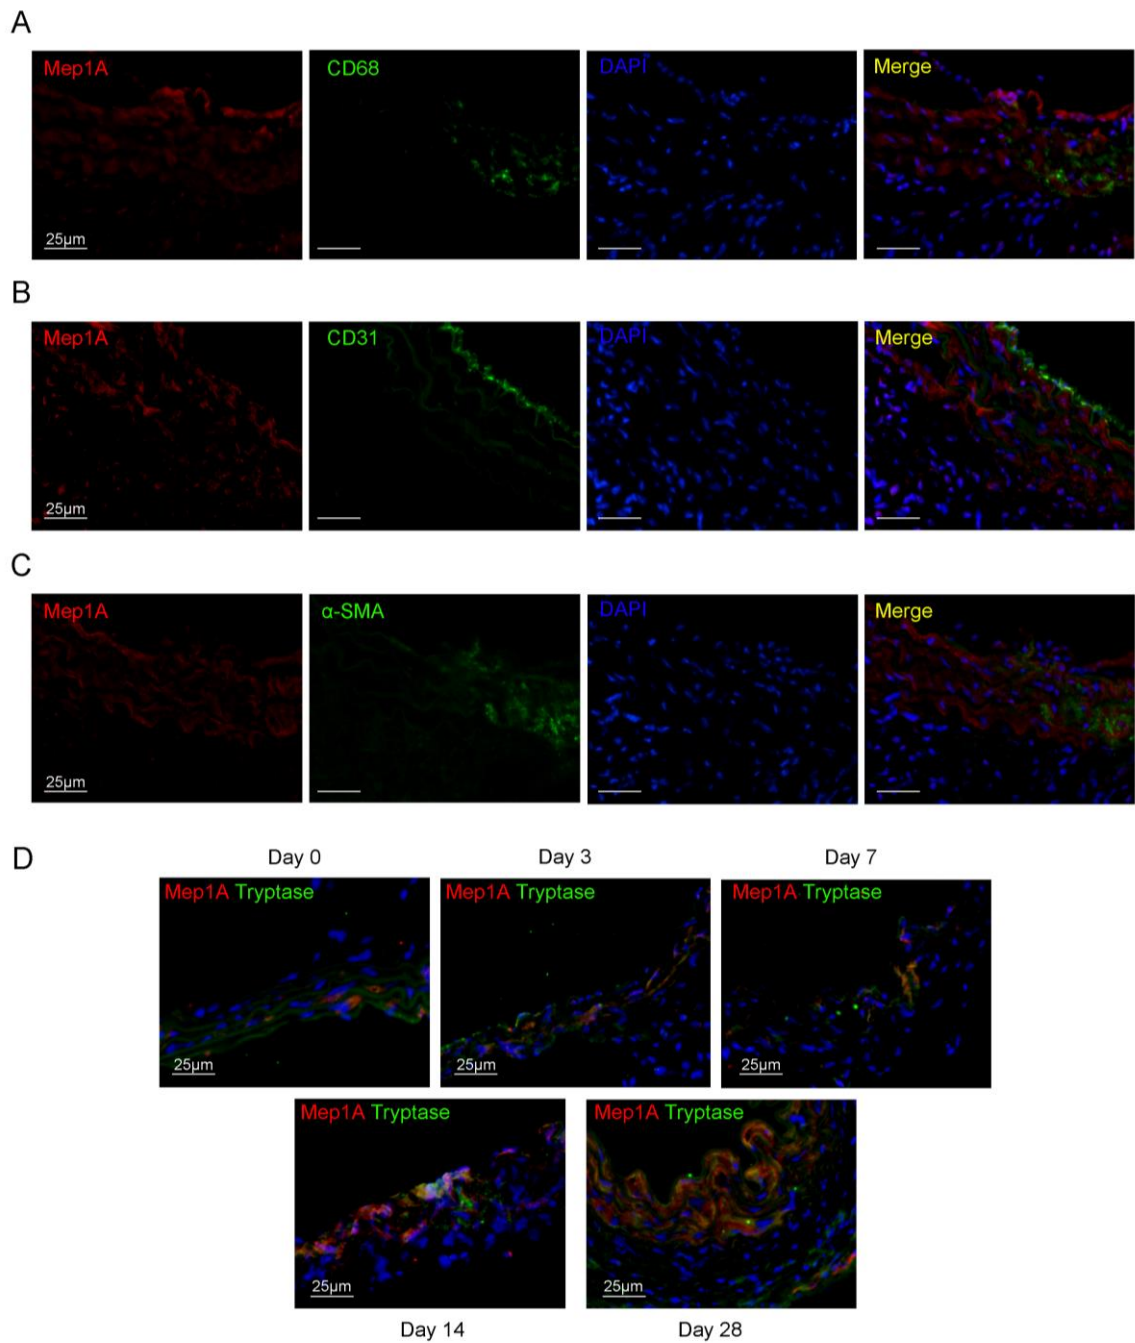

**Figure S3. Immunofluorescence staining of Mep1A and different cell markers.**

(A) Immunofluorescence staining of Mep1A and CD68 (macrophage marker). Mep1A: red, CD68: green, DAPI: blue. (B) Immunofluorescence staining of Mep1A and CD31 (endothelial cell marker). Mep1A: red, CD31: green, DAPI: blue. (C) Immunofluorescence staining of Mep1A and  $\alpha$ -SMA (smooth muscle cells marker). Mep1A: red,  $\alpha$ -SMA: green, DAPI: blue. (D) Immunofluorescence staining of Mep1A and Tryptase (mast cell marker) with different time points. Mep1A: red, Tryptase: green, DAPI: blue.

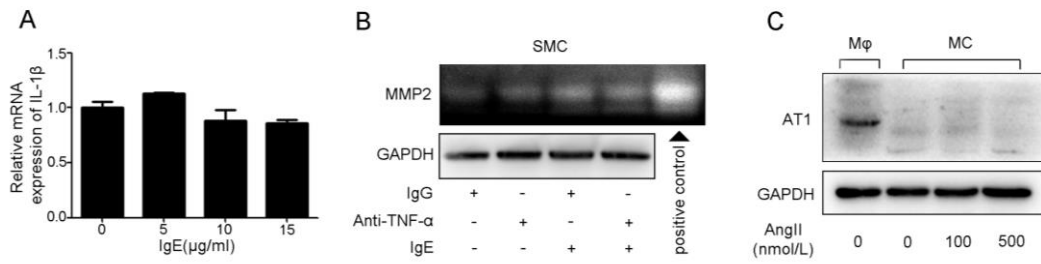

**Figure S4. Cellular mechanism.**

(A) RT-PCR analysis of IL-1 $\beta$  expression in MCs treated with IgE in different doses as indicated. (B) Gelatin zymography to detect MMP2 activity in SMCs treated with the indicated supernatant. (positive control: Recombinant protein MMP2) (C) Immunoblot to detect the expression of angiotensin II type 1 receptor (AT1) in macrophages (M $\phi$ ) and MCs after treated with AngII in the indicated doses. Data represent mean  $\pm$  SEM of five independent experiments. One-way ANOVA was conducted to examine the statistical significance for A. \**P* value <0.05 was considered statistically significant.

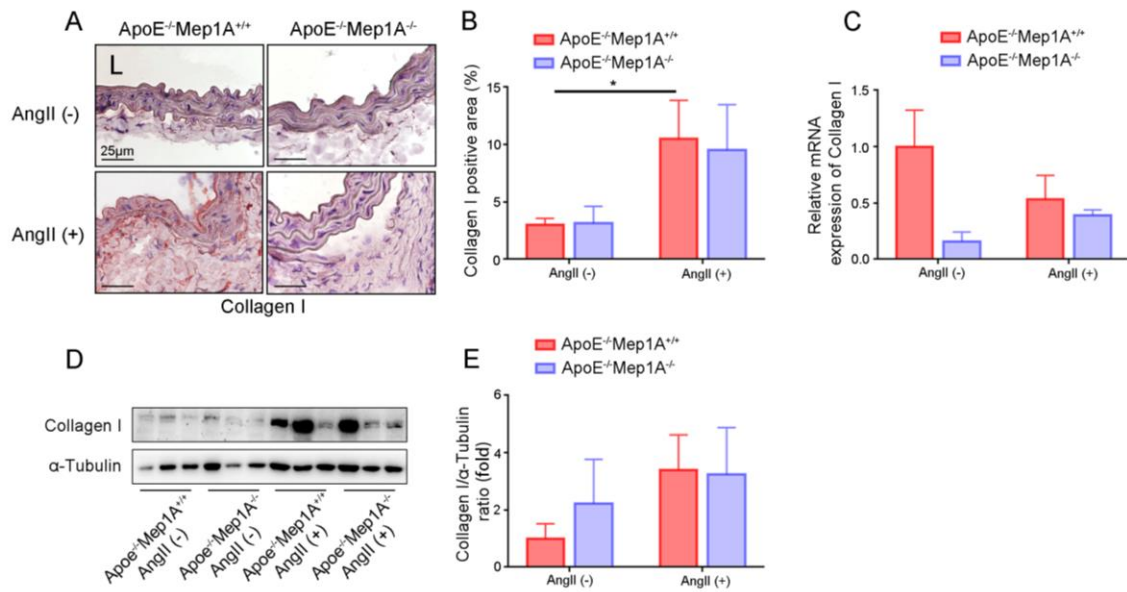

**Figure S5. Expression of Collagen I in aorta.**

(A) Representative images of immunohistochemical analysis for Collagen I in the arterial wall of the mice. (B) Percentages of positive Collagen I staining in different groups respectively. (C) RT-PCR analysis of Collagen I in indicated mice. (D) Representative image of immunoblot to detect the expression of Collagen I in mice arterial wall. (E) Quantification of Collagen I expression by immunoblot. Data represent mean  $\pm$  SEM. ApoE<sup>-/-</sup>Mep1A<sup>+/+</sup> mice treated with PBS (n=5), ApoE<sup>-/-</sup>Mep1A<sup>-/-</sup> mice treated with PBS (n=6), ApoE<sup>-/-</sup>Mep1A<sup>+/+</sup> mice treated with AngII (n=5) and ApoE<sup>-/-</sup>Mep1A<sup>-/-</sup> mice treated with AngII (n=6). Two-way ANOVA was conducted to examine the statistical significance for all data from experimental AAAs. \**P* value <0.05 was considered statistically significant. L: lumen.

## Supplemental Tables

**Table S1. Clinical information of samples**

|                           | Control (n=7) | AAA patients (n=6) | p     |
|---------------------------|---------------|--------------------|-------|
| Sex: Male <sup>C</sup>    | 85.71% (6/7)  | 100% (6/6)         | 0.335 |
| Age(yrs) <sup>T</sup>     |               |                    |       |
| Mean                      | 68.86 ± 20.69 | 49.00 ± 19.28      | 0.117 |
| Median                    | 82            | 55                 |       |
| Range                     | 42-92         | 15-65              |       |
| Hypertension <sup>C</sup> | 14.29% (1/7)  | 33.33% (2/6)       | 0.416 |
| Diabetes <sup>C</sup>     | 14.29% (1/7)  | 0% (0/6)           | 0.335 |
| Smoking <sup>C</sup>      | 0% (0/7)      | 33.33% (2/6)       | 0.097 |
| Alcohol <sup>C</sup>      | 14.29% (1/7)  | 16.67% (1/6)       | 0.906 |

C Chi-Square Tests; T t-test \*p<0.05

**Table S2. RT-PCR Primers**

| <b>Primer name</b>     | <b>Primer sequence (5'-3')</b> |
|------------------------|--------------------------------|
| hMep1A Forward         | TGACAGCACAGGCAATGTTCCG         |
| hMep1A Reverse         | GTCGCCTTTTGTGCCCTGGAAA         |
| hMep1B Forward         | ATGCTGACTGGCAACGGGTTTC         |
| hMep1B Reverse         | CAGCGTTCTACTTTCCAGCACTG        |
| mMep1A Forward         | CTGATACCAGGAACAGGATGTCC        |
| mMep1A Reverse         | CATAGACTCCCACCTTGGATGG         |
| mMep1B Forward         | GGTTTCACAGGTTCTCAGTGCC         |
| mMep1B Reverse         | CAGTCTGCTCTCCAACATCGCC         |
| rMep1A Forward         | TTCCAGCAGAAGCGTGATAC           |
| rMep1A Reverse         | TACGTTACACAGGTGCCTT            |
| mTNF- $\alpha$ Forward | GGTGCCTATGTCTCAGCCTCTT         |
| mTNF- $\alpha$ Reverse | GCCATAGAACTGATGAGAGGGAG        |
| rTNF- $\alpha$ Forward | ACTGAACTTCGGGGTGATCG           |
| rTNF- $\alpha$ Reverse | GCTTGGTGGTTTGCTACGAC           |
| mMMP2 Forward          | CAAGGATGGACTCCTGGCACAT         |
| mMMP2 Reverse          | TACTCGCCATCAGCGTTCCCAT         |
| mCollagen I Forward    | CCTCAGGGTATTGCTGGACAAC         |
| mCollagen I Reverse    | CAGAAGGACCTTGTTTGCCAGG         |
| rIL-1 $\beta$ Forward  | TGGACCTTCCAGGATGAGGACA         |
| rIL-1 $\beta$ Reverse  | GTTCATCTCGGAGCCTGTAGTG         |
| mGAPDH Forward         | CATCACTGCCACCCAGAAGACTG        |
| mGAPDH Reverse         | ATGCCAGTGAGCTTCCCGTTCAG        |
| hGAPDH Forward         | GTCTCCTCTGACTTCAACAGCG         |
| hGAPDH Reverse         | ACCACCCTGTTGCTGTAGCCAA         |
